# Supplementary material for: Diagnostic Yield and Treatment Impact of Targeted Exome Sequencing in Early-Onset Epilepsy
Source: Front Neurol. 2019 May 21;10:434. doi: 10.3389/fneur.2019.00434 (PMC6536592; doi:10.3389/fneur.2019.00434)
Supplement: Supplementary file 1 [file Table_1.xlsx]

## Sheet: Table 1
Supplementary Table 1: Gene list with coverage
Possible Actionable Importance
Symbol	Name	Location	OMIM Number	>20x cov (%)
ALDH7A1	aldehyde dehydrogenase 7 family member A1	5q23.2	107323	0.792935
ALPL	alkaline phosphatase, liver/bone/kidney	1p36.12	171760	0.883738
AMT	aminomethyltransferase	3p21.31	238310	0.984915
ATAD1	ATPase family, AAA domain containing 1	10q23.31	614452	0.928845
ATP1A2	ATPase Na+/K+ transporting subunit alpha 2	1q23.2	182340	0.966316
BTD	biotinidase	3p25.1	609019	1
CSTB	cystatin B	21q22.3	601145	1
EPM2A	EPM2A, laforin glucan phosphatase	6q24.3	607566	0.554093
ETFA	electron transfer flavoprotein alpha subunit	15q24.2-q24.3	608053	1
ETFB	electron transfer flavoprotein beta subunit	19q13.41	130410	1
ETFDH	electron transfer flavoprotein dehydrogenase	4q32.1	231675	1
FOLR1	folate receptor 1	11q13.4	136430	0.859425
GAMT	guanidinoacetate N-methyltransferase	19p13.3	601240	0.597846
GATM	glycine amidinotransferase	15q21.1	602360	0.878505
GCH1	GTP cyclohydrolase 1	14q22.2	600225	1
GCSH	glycine cleavage system protein H	16q23.2	238330	0.909665
GLDC	glycine decarboxylase	9p24.1	238300	0.995827
KCNA2	potassium voltage-gated channel subfamily A member 2	1p13.3	176262	1
KCNH2	potassium voltage-gated channel subfamily H member 2	7q36.1	152427	0.854443
KCNQ2	potassium voltage-gated channel subfamily Q member 2	20q13.33	602235	0.995624
KCNT1	potassium sodium-activated channel subfamily T member 1	9q34.3	608167	0.987966
MOCS1	molybdenum cofactor synthesis 1	6p21.2	603707	1
MTHFR	methylenetetrahydrofolate reductase	1p36.22	607093	0.974285
NHLRC1	NHL repeat containing E3 ubiquitin protein ligase 1	6p22.3	608072	0.857611
NNT	nicotinamide nucleotide transhydrogenase	5p12	607878	1
OTC	ornithine carbamoyltransferase	Xp11.4	300461	0.872925
PDHA1	pyruvate dehydrogenase (lipoamide) alpha 1	Xp22.12	300502	1
PDSS1	decaprenyl diphosphate synthase subunit 1	10p12.1	607429	0.967241
PDSS2	decaprenyl diphosphate synthase subunit 2	6q21	610564	1
PHGDH	phosphoglycerate dehydrogenase	1p12	606879	1
PIGM	phosphatidylinositol glycan anchor biosynthesis class M	1q23.2	610273	1
PNPO	pyridoxamine 5'-phosphate oxidase	17q21.32	603287	0.932333
POLG	DNA polymerase gamma, catalytic subunit	15q26.1	174763	0.99531
PRRT2	proline rich transmembrane protein 2	16p11.2	614386	0.973472
PSAT1	phosphoserine aminotransferase 1	9q21.2	610936	0.880545
PSPH	phosphoserine phosphatase	7p11.2	172480	0.923953
PTH	parathyroid hormone	11p15.3	168450	1
QDPR	quinoid dihydropteridine reductase	4p15.32	612676	0.419179
SCN1A	sodium voltage-gated channel alpha subunit 1	2q24.3	182389	0.88287
SCN1B	sodium voltage-gated channel beta subunit 1	19q13.11	600235	0.890293
SCN2A	sodium voltage-gated channel alpha subunit 2	2q24.3	182390	1
SCN5A	sodium voltage-gated channel alpha subunit 5	3p22.2	600163	1
SLC19A3	solute carrier family 19 member 3	2q36.3	606152	0.897499
SLC25A15	solute carrier family 25 member 15	13q14.11	603861	1
SLC2A1	solute carrier family 2 member 1	1p34.2	138140	1
SLC46A1	solute carrier family 46 member 1	17q11.2	611672	0.996944
SLC6A8	solute carrier family 6 member 8	Xq28	300036	0.767983
Known Associated Genes
Symbol	Name	Location	OMIM Number	>20x cov (%)
AARS	alanyl-tRNA synthetase	16q22.1	601065	1
ABCC2	ATP binding cassette subfamily C member 2	10q24.2	601107	0.973855
ABCC8	ATP binding cassette subfamily C member 8	11p15.1	600509	0.984992
ACADS	acyl-CoA dehydrogenase, C-2 to C-3 short chain	12q24.31	606885	0.918195
ACO2	aconitase 2	22q13.2	100850	1
ACOX1	acyl-CoA oxidase 1	17q25.1	609751	1
ACSF3	acyl-CoA synthetase family member 3	16q24.3	614245	1
ACTB	actin beta	7p22.1	102630	1
ACY1	aminoacylase 1	3p21.2	104620	0.991732
ADCK3	AarF Domain Containing Kinase 3	1q42.13	606980	1
ADGRG1	adhesion G protein-coupled receptor G1	16q21	604110	0.98721
ADK	adenosine kinase	10q22.2|10q11-q24	102750	0.962825
ADSL	adenylosuccinate lyase	22q13.1	608222	1
AFG3L2	AFG3 like matrix AAA peptidase subunit 2	18p11.21	604581	0.966037
AGA	aspartylglucosaminidase	4q34.3	613228	1
AGL	amylo-alpha-1, 6-glucosidase, 4-alpha-glucanotransferase	1p21.2	610860	0.939204
AGTR2	angiotensin II receptor type 2	Xq23	300034	1
AHI1	Abelson helper integration site 1	6q23.3	608894	1
AKT3	AKT serine/threonine kinase 3	1q43-q44	611223	0.962726
ALDH4A1	aldehyde dehydrogenase 4 family member A1	1p36.13	606811	0.916009
ALDH5A1	aldehyde dehydrogenase 5 family member A1	6p22.3	610045	0.912517
ALG1	ALG1, chitobiosyldiphosphodolichol beta-mannosyltransferase	16p13.3	605907	0.997234
ALG11	ALG11, alpha-1,2-mannosyltransferase	13q14.3	613666	0.982914
ALG12	ALG12, alpha-1,6-mannosyltransferase	22q13.33	607144	0.911444
ALG13	ALG13, UDP-N-acetylglucosaminyltransferase subunit	Xq23	300776	1
ALG2	ALG2, alpha-1,3/1,6-mannosyltransferase	9q22.33	607905	0.801129
ALG3	ALG3, alpha-1,3- mannosyltransferase	3q27.1	608750	1
ALG6	ALG6, alpha-1,3-glucosyltransferase	1p31.3	604566	1
ALG8	ALG8, alpha-1,3-glucosyltransferase	11q14.1	608103	0.941176
ALG9	ALG9, alpha-1,2-mannosyltransferase	11q23.1	606941	0.932939
ANKRD11	ankyrin repeat domain 11	16q24.3	611192	0.942817
AP3B2	adaptor related protein complex 3 beta 2 subunit	15q25.2	602166	0.739165
APTX	aprataxin	9p21.1	606350	0.876082
ARFGEF2	ADP ribosylation factor guanine nucleotide exchange factor 2	20q13.13	605371	1
ARHGEF15	Rho guanine nucleotide exchange factor 15	17p13.1	608504	0.959954
ARHGEF9	Cdc42 guanine nucleotide exchange factor 9	Xq11.1	300429	1
ARID1B	AT-rich interaction domain 1B	6q25.3	614556	0.958875
ARL13B	ADP ribosylation factor like GTPase 13B	3q11.1-q11.2	608922	0.972856
ARSA	arylsulfatase A	22q13.33	607574	0.93084
ARSB	arylsulfatase B	5q14.1	611542	0.674744
ARV1	ARV1 homolog, fatty acid homeostasis modulator	1q42.2	611647	0.800085
ARX	aristaless related homeobox	Xp21.3	300382	0.828366
ASAH1	N-acylsphingosine amidohydrolase 1	8p22	613468	0.992208
ASH1L	ASH1 like histone lysine methyltransferase	1q22	607999	0.91067
ASPA	aspartoacylase	17p13.2	608034	1
ASPM	abnormal spindle microtubule assembly	1q31.3	605481	0.912122
ASXL3	additional sex combs like 3, transcriptional regulator	18q12.1	615115	0.54692
ATIC	5-aminoimidazole-4-carboxamide ribonucleotide formyltransferase/IMP cyclohydrolase	2q35	601731	0.964444
ATN1	atrophin 1	12p13.31	607462	1
ATP1A3	ATPase Na+/K+ transporting subunit alpha 3	19q13.2	182350	0.885609
ATP2A2	ATPase sarcoplasmic/endoplasmic reticulum Ca2+ transporting 2	12q24.11	108740	0.945455
ATP5A1	ATP synthase, H+ transporting, mitochondrial F1 complex, alpha subunit 1, cardiac muscle	18q21.1	164360	0.852262
ATP6AP2	ATPase H+ transporting accessory protein 2	Xp11.4	300556	1
ATP6V0A2	ATPase H+ transporting V0 subunit a2	12q24.31	611716	0.980595
ATP6V1A	ATPase H+ transporting V1 subunit A	3q13.31	607027	0.304688
ATP7A	ATPase copper transporting alpha	Xq21.1	300011	0.98156
ATPAF2	ATP synthase mitochondrial F1 complex assembly factor 2	17p11.2	608918	0.965031
ATR	ATR serine/threonine kinase	3q23	601215	0.979676
ATRX	ATRX, chromatin remodeler	Xq21.1	300032	0.978876
AUH	AU RNA binding methylglutaconyl-CoA hydratase	9q22.31	600529	0.712678
B4GALT1	beta-1,4-galactosyltransferase 1	9p21.1	137060	0.854994
BCKDHA	branched chain keto acid dehydrogenase E1, alpha polypeptide	19q13.2	608348	1
BCKDHB	branched chain keto acid dehydrogenase E1 subunit beta	6q14.1	248611	0.845274
BCKDK	branched chain ketoacid dehydrogenase kinase	16p11.2	614901	0.677414
BCL11A	B-cell CLL/lymphoma 11A	2p16.1	606557	0.83307
BCS1L	BCS1 homolog, ubiquinol-cytochrome c reductase complex chaperone	2q35	603647	0.768836
BMP4	bone morphogenetic protein 4	14q22.2	112262	1
BRAT1	BRCA1 associated ATM activator 1	7p22.3	614506	1
C10orf2	TWINKLE mtDNA Helicase; TWNK	10q24.31	606075	1
C12orf57	chromosome 12 open reading frame 57	12p13.31	615140	1
C12orf65	chromosome 12 open reading frame 65	12q24.31	613541	0.965015
CACNA1A	calcium voltage-gated channel subunit alpha1 A	19p13.13	601011	0.965332
CACNA1D	calcium voltage-gated channel subunit alpha1 D	3p21.1	114206	0.975895
CACNA1E	calcium voltage-gated channel subunit alpha1 E	1q25.3	601013	0.532423
CACNB4	calcium voltage-gated channel auxiliary subunit beta 4	2q23.3	601949	0.995198
CACNG2	calcium voltage-gated channel auxiliary subunit gamma 2	22q12.3	602911	1
CAD	carbamoyl-phosphate synthetase 2, aspartate transcarbamylase, and dihydroorotase	2p23.3	114010	0.884044
CAMK2A	calcium/calmodulin dependent protein kinase II alpha	5q32	114078	0.969845
CAMK2B	calcium/calmodulin dependent protein kinase II beta	7p13	607707	0.914433
CASK	calcium/calmodulin dependent serine protein kinase	Xp11.4	300172	1
CASR	calcium sensing receptor	3q13.33-q21.1	601199	1
CBL	Cbl proto-oncogene	11q23.3	165360	1
CC2D2A	coiled-coil and C2 domain containing 2A	4p15.32	612013	0.981232
CCDC88C	coiled-coil domain containing 88C	14q32.11-q32.12	611204	0.947857
CDC42	cell division cycle 42	1p36.12	116952	0.604938
CDK5RAP2	CDK5 regulatory subunit associated protein 2	9q33.2	608201	0.644982
CDKL5	cyclin dependent kinase like 5	Xp22.13	300203	0.938781
CDON	cell adhesion associated, oncogene regulated	11q24.2	608707	0.985587
CENPJ	centromere protein J	13q12.12-q12.13	609279	0.990142
CEP152	centrosomal protein 152	15q21.1	613529	0.9237
CEP290	centrosomal protein 290	12q21.32	610142	0.973416
CHD2	chromodomain helicase DNA binding protein 2	15q26.1	602119	0.998671
CHRNA2	cholinergic receptor nicotinic alpha 2 subunit	8p21.2	118502	0.946541
CHRNA4	cholinergic receptor nicotinic alpha 4 subunit	20q13.33	118504	0.921162
CHRNA7	cholinergic receptor nicotinic alpha 7 subunit	15q13.3	118511	0.94798
CHRNB2	cholinergic receptor nicotinic beta 2 subunit	1q21.3	118507	0.96415
CLCN2	chloride voltage-gated channel 2	3q27.1	600570	0.971819
CLCN4	chloride voltage-gated channel 4	Xp22.2	302910	0.970958
CLCNKA	chloride voltage-gated channel Ka	1p36.13	602024	0.842486
CLCNKB	chloride voltage-gated channel Kb	1p36.13	602023	0.283726
CLN3	CLN3, battenin	16p12.1	607042	0.945166
CLN5	ceroid-lipofuscinosis, neuronal 5	13q22.3	608102	0.896965
CLN6	ceroid-lipofuscinosis, neuronal 6, late infantile, variant	15q23	606725	0.927565
CLN8	ceroid-lipofuscinosis, neuronal 8	8p23.3	607837	1
CNKSR2	connector enhancer of kinase suppressor of Ras 2	Xp22.12	300724	0.958271
CNPY3	canopy FGF signaling regulator 3	6p21.1	610774	0.888268
CNTN2	contactin 2	1q32.1	190197	1
CNTNAP2	contactin associated protein-like 2	7q35-q36.1	604569	0.975655
COG1	component of oligomeric golgi complex 1	17q25.1	606973	0.934924
COG4	component of oligomeric golgi complex 4	16q22.1	606976	0.941084
COG5	component of oligomeric golgi complex 5	7q22.3	606821	1
COG6	component of oligomeric golgi complex 6	13q14.11	606977	0.968589
COG7	component of oligomeric golgi complex 7	16p12.2	606978	0.93738
COG8	component of oligomeric golgi complex 8	16q22.1	606979	0.881615
COL18A1	collagen type XVIII alpha 1 chain	21q22.3	120328	0.986137
COL4A1	collagen type IV alpha 1 chain	13q34	120130	0.956442
COL4A2	collagen type IV alpha 2 chain	13q34	120090	0.976995
COL4A3BP	collagen type IV alpha 3 binding protein	5q13.3	604677	0.773924
COQ2	coenzyme Q2, polyprenyltransferase	4q21.22-q21.23	609825	0.901054
COQ6	coenzyme Q6, monooxygenase	14q24.3	614647	0.937355
COQ9	coenzyme Q9	16q21	612837	1
COX10	COX10, heme A:farnesyltransferase cytochrome c oxidase assembly factor	17p12	602125	0.900945
COX15	COX15, cytochrome c oxidase assembly homolog	10q24.2	603646	0.947393
COX6B1	cytochrome c oxidase subunit 6B1	19q13.12	124089	1
CPA6	carboxypeptidase A6	8q13.2	609562	0.930025
CPLX1	complexin 1	4p16.3	605032	0.21875
CPT1A	carnitine palmitoyltransferase 1A	11q13.3	600528	0.936178
CPT2	carnitine palmitoyltransferase 2	1p32.3	600650	0.931188
CTSA	cathepsin A	20q13.12	613111	0.947808
CTSD	cathepsin D	11p15.5	116840	0.848101
CTSF	cathepsin F	11q13.2	603539	0.99115
CUL4B	cullin 4B	Xq24	300304	0.976348
CUX2	cut like homeobox 2	12q24.11-q24.12	610648	0.595252
CYB5R3	cytochrome b5 reductase 3	22q13.2	613213	0.92637
CYFIP2	cytoplasmic FMR1 interacting protein 2	5q33.3	606323	0.883969
D2HGDH	D-2-hydroxyglutarate dehydrogenase	2q37.3	609186	0.931111
DBT	dihydrolipoamide branched chain transacylase E2	1p21.2	248610	0.998472
DCX	doublecortin	Xq23	300121	0.989127
DDC	dopa decarboxylase	7p12.2-p12.1	107930	1
DDOST	dolichyl-diphosphooligosaccharide--protein glycosyltransferase non-catalytic subunit	1p36.12	602202	0.905677
DDX3X	DEAD-box helicase 3, X-linked	Xp11.4	300160	0.48688
DENND5A	DENN domain containing 5A	11p15.4	617278	0.552762
DEPDC5	DEP domain containing 5	22q12.2-q12.3	614191	0.965081
DHCR24	24-dehydrocholesterol reductase	1p32.3	606418	1
DHCR7	7-dehydrocholesterol reductase	11q13.4	602858	0.918711
DHDDS	dehydrodolichyl diphosphate synthase subunit	1p36.11	608172	0.67915
DHFR	dihydrofolate reductase	5q14.1	126060	0.931034
DHX30	DExH-box helicase 30	3p21.31	616423	0.888222
DIAPH1	diaphanous related formin 1	5q31.3	602121	0.936597
DLD	dihydrolipoamide dehydrogenase	7q31.1	238331	1
DNAJC5	DnaJ heat shock protein family (Hsp40) member C5	20q13.33	611203	0.999178
DNAJC6	DnaJ heat shock protein family (Hsp40) member C6	1p31.3	608375	0.961469
DNM1	dynamin 1	9q34.11	602377	0.904872
DOCK7	dedicator of cytokinesis 7	1p31.3	615730	0.98549
DOLK	dolichol kinase	9q34.11	610746	1
DPAGT1	dolichyl-phosphate N-acetylglucosaminephosphotransferase 1	11q23.3	191350	0.899597
DPF2	double PHD fingers 2	11q13.1	601671	0.417799
DPM1	dolichyl-phosphate mannosyltransferase subunit 1, catalytic	20q13.13	603503	0.913732
DPM3	dolichyl-phosphate mannosyltransferase subunit 3	1q22	605951	1
DPYD	dihydropyrimidine dehydrogenase	1p21.3	612779	0.975053
DPYS	dihydropyrimidinase	8q22.3	613326	0.820063
DYNC1H1	dynein cytoplasmic 1 heavy chain 1	14q32.31	600112	0.985054
DYRK1A	dual specificity tyrosine phosphorylation regulated kinase 1A	21q22.13	600855	1
EEF1A2	eukaryotic translation elongation factor 1 alpha 2	20q13.33	602959	0.925039
EFHC1	EF-hand domain containing 1	6p12.2	608815	0.949786
EFHC2	EF-hand domain containing 2	Xp11.3	300817	0.77693
EHMT1	euchromatic histone lysine methyltransferase 1	9q34.3	607001	0.991843
EIF2B1	eukaryotic translation initiation factor 2B subunit alpha	12q24.31	606686	0.9561
EIF2B2	eukaryotic translation initiation factor 2B subunit beta	14q24.3	606454	0.874614
EIF2B3	eukaryotic translation initiation factor 2B subunit gamma	1p34.1	606273	1
EIF2B4	eukaryotic translation initiation factor 2B subunit delta	2p23.3	606687	0.881329
EIF2B5	eukaryotic translation initiation factor 2B subunit epsilon	3q27.1	603945	0.936358
EMX2	empty spiracles homeobox 2	10q26.11	600035	0.817403
FARS2	phenylalanyl-tRNA synthetase 2, mitochondrial	6p25.1	611592	0.900419
FBXO11	F-box protein 11	2p16.3	607871	0.722467
FGD1	FYVE, RhoGEF and PH domain containing 1	Xp11.22	300546	1
FGF12	fibroblast growth factor 12	3q28-q29	601513	0.930454
FGF13	fibroblast growth factor 13	Xq26.3-q27.1	300070	0.9824
FGF8	fibroblast growth factor 8	10q24.32	600483	0.700661
FH	fumarate hydratase	1q43	136850	1
FIG4	FIG4 phosphoinositide 5-phosphatase	6q21	609390	0.813919
FKRP	fukutin related protein	19q13.32	606596	0.940394
FKTN	fukutin	9q31.2	607440	0.992003
FLNA	filamin A	Xq28	300017	1
FOXG1	forkhead box G1	14q12	164874	0.834493
FOXH1	forkhead box H1	8q24.3	603621	1
FOXRED1	FAD dependent oxidoreductase domain containing 1	11q24.2	613622	1
FRRS1L	ferric chelate reductase 1 like	9q31.3	604574	0.82
FUCA1	fucosidase, alpha-L- 1, tissue	1p36.11	612280	0.789522
GABBR1	gamma-aminobutyric acid type B receptor subunit 1	6p22.1	603540	1
GABBR2	gamma-aminobutyric acid type B receptor subunit 2	9q22.33	607340	0.953065
GABRA1	gamma-aminobutyric acid type A receptor alpha1 subunit	5q34	137160	1
GABRA6	gamma-aminobutyric acid type A receptor alpha6 subunit	5q34	137143	1
GABRB1	gamma-aminobutyric acid type A receptor beta1 subunit	4p12	137190	1
GABRB2	gamma-aminobutyric acid type A receptor beta2 subunit	5q34	600232	0.972739
GABRB3	gamma-aminobutyric acid type A receptor beta3 subunit	15q12	137192	0.954131
GABRD	gamma-aminobutyric acid type A receptor delta subunit	1p36.33	137163	0.899206
GABRG1	gamma-aminobutyric acid type A receptor gamma1 subunit	4p12	137166	0.994458
GABRG2	gamma-aminobutyric acid type A receptor gamma2 subunit	5q34	137164	1
GALC	galactosylceramidase	14q31.3	606890	0.930215
GALNS	galactosamine (N-acetyl)-6-sulfatase	16q24.3	612222	0.658482
GBA	glucosylceramidase beta	1q22	606463	1
GCDH	glutaryl-CoA dehydrogenase	19p13.13	608801	0.791472
GCK	glucokinase	7p13	138079	1
GFAP	glial fibrillary acidic protein	17q21.31	137780	0.932913
GFM1	G elongation factor mitochondrial 1	3q25.32	606639	1
GJC2	gap junction protein gamma 2	1q42.13	608803	0.99206
GK	glycerol kinase	Xp21.2	300474	0.821874
GLB1	galactosidase beta 1	3p22.3	611458	0.948436
GLI2	GLI family zinc finger 2	2q14.2	165230	0.985511
GLI3	GLI family zinc finger 3	7p14.1	165240	0.997849
GLRA1	glycine receptor alpha 1	5q33.1	138491	1
GLRB	glycine receptor beta	4q32.1	138492	0.924003
GLUD1	glutamate dehydrogenase 1	10q23.2	138130	0.925326
GLUL	glutamate-ammonia ligase	1q25.3	138290	0.957691
GLYCTK	glycerate kinase	3p21.2	610516	0.840239
GNAO1	G protein subunit alpha o1	16q13	139311	1
GNAQ	G protein subunit alpha q	9q21.2	600998	0.885108
GNB1	G protein subunit beta 1	1p36.33	139380	0.950381
GNE	glucosamine (UDP-N-acetyl)-2-epimerase/N-acetylmannosamine kinase	9p13.3	603824	0.984314
GNPTAB	N-acetylglucosamine-1-phosphate transferase alpha and beta subunits	12q23.2	607840	0.987524
GNPTG	N-acetylglucosamine-1-phosphate transferase gamma subunit	16p13.3	607838	0.907817
GNS	glucosamine (N-acetyl)-6-sulfatase	12q14.3	607664	0.949991
GOSR2	golgi SNAP receptor complex member 2	17q21.32	604027	0.879837
GPC3	glypican 3	Xq26.2	300037	0.975344
GPHN	gephyrin	14q23.3-q24.1	603930	0.969388
GPSM2	G-protein signaling modulator 2	1p13.3	609245	0.967792
GRIA3	glutamate ionotropic receptor AMPA type subunit 3	Xq25	305915	1
GRIN1	glutamate ionotropic receptor NMDA type subunit 1	9q34.3	138249	0.996746
GRIN2A	glutamate ionotropic receptor NMDA type subunit 2A	16p13.2	138253	0.970117
GRIN2B	glutamate ionotropic receptor NMDA type subunit 2B	12p13.1	138252	0.981396
GRIN2D	glutamate ionotropic receptor NMDA type subunit 2D	19q13.33	602717	0.334508
GRN	granulin precursor	17q21.31	138945	0.945447
GUSB	glucuronidase beta	7q11.21	611499	1
HCN1	hyperpolarization activated cyclic nucleotide gated potassium channel 1	5p12	602780	0.973223
HERC2	HECT and RLD domain containing E3 ubiquitin protein ligase 2	15q13.1	605837	0.974121
HEXA	hexosaminidase subunit alpha	15q23	606869	1
HEXB	hexosaminidase subunit beta	5q13.3	606873	0.950122
HGSNAT	heparan-alpha-glucosaminide N-acetyltransferase	8p11.21-p11.1	610453	0.946131
HNRNPH2	heterogeneous nuclear ribonucleoprotein H2 (H')	Xq22.1	300610	0.771147
HNRNPU	heterogeneous nuclear ribonucleoprotein U	1q44	602869	0.963662
HPD	4-hydroxyphenylpyruvate dioxygenase	12q24.31	609695	0.995157
HRAS	HRas proto-oncogene, GTPase	11p15.5	190020	0.871752
HSD17B10	hydroxysteroid 17-beta dehydrogenase 10	Xp11.22	300256	0.967615
HSD17B4	hydroxysteroid 17-beta dehydrogenase 4	5q23.1	601860	0.953488
HUWE1	HECT, UBA and WWE domain containing 1, E3 ubiquitin protein ligase	Xp11.22	300697	0.999105
HYAL1	hyaluronoglucosaminidase 1	3p21.31	607071	0.962683
IDH2	isocitrate dehydrogenase (NADP(+)) 2, mitochondrial	15q26.1	147650	0.854506
IDS	iduronate 2-sulfatase	Xq28	300823	0.978365
IDUA	iduronidase, alpha-L-	4p16.3	252800	0.8897
IER3IP1	immediate early response 3 interacting protein 1	18q21.1	609382	1
IL27RA	interleukin 27 receptor subunit alpha	19p13.12	605350	0.986772
INPP5E	inositol polyphosphate-5-phosphatase E	9q34.3	613037	0.994828
IQSEC2	IQ motif and Sec7 domain 2	Xp11.22	300522	1
ITPA	inosine triphosphatase	20p13	147520	0.417535
JRK	Jrk helix-turn-helix protein	8q24.3	603210	0.616833
KANSL1	KAT8 regulatory NSL complex subunit 1	17q21.31	612452	0.963256
KCNA1	potassium voltage-gated channel subfamily A member 1	12p13.32	176260	0.931082
KCNA4	potassium voltage-gated channel subfamily A member 4	11p14.1	176266	1
KCNAB1	potassium voltage-gated channel subfamily A member regulatory beta subunit 1	3q25.31	601141	0.956984
KCNAB2	potassium voltage-gated channel subfamily A regulatory beta subunit 2	1p36.31	601142	1
KCNB1	potassium voltage-gated channel subfamily B member 1	20q13.13	600397	0.96599
KCNC1	potassium voltage-gated channel subfamily C member 1	11p15.1	176258	0.796402
KCND2	potassium voltage-gated channel subfamily D member 2	7q31.31	605410	0.881054
KCNE2	potassium voltage-gated channel subfamily E regulatory subunit 2	21q22.11	603796	0.31411
KCNH1	potassium voltage-gated channel subfamily H member 1	1q32.2	603305	0.700551
KCNJ1	potassium voltage-gated channel subfamily J member 1	11q24.3	600359	1
KCNJ10	potassium voltage-gated channel subfamily J member 10	1q23.2	602208	0.949041
KCNJ11	potassium voltage-gated channel subfamily J member 11	11p15.1	600937	1
KCNMA1	potassium calcium-activated channel subfamily M alpha 1	10q22.3	600150	0.935358
KCNQ3	potassium voltage-gated channel subfamily Q member 3	8q24.22	602232	0.994387
KCNQ5	potassium voltage-gated channel subfamily Q member 5	6q13	607357	0.890547
KCNV1	potassium voltage-gated channel modifier subfamily V member 1	8q23.2	608164	1
KCNV2	potassium voltage-gated channel modifier subfamily V member 2	9p24.2	607604	1
KCTD7	potassium channel tetramerization domain containing 7	7q11.21	611725	0.961842
KDM5C	lysine demethylase 5C	Xp11.22	314690	0.964696
KDM6A	lysine demethylase 6A	Xp11.3	300128	0.961255
KIAA1279	Kinesin-binding protein; KIF1BP	10q22.1	609367	0.991194
KIAA2022	KIAA2022	Xq13.3	300524	0.89
KIF5C	kinesin family member 5C	2q23.1-q23.2	604593	1
KMT2C	lysine methyltransferase 2C	7q36.1	606833	0.922818
KMT2D	lysine methyltransferase 2D	12q13.12	602113	0.975654
KMT5B	lysine methyltransferase 5B	11q13.2	610881	0.999487
KPNA7	karyopherin subunit alpha 7	7q22.1	614107	0.943417
KRAS	KRAS proto-oncogene, GTPase	12p12.1	190070	0.981742
L2HGDH	L-2-hydroxyglutarate dehydrogenase	14q21.3	609584	0.672292
LAMA2	laminin subunit alpha 2	6q22.33	156225	0.988073
LBR	lamin B receptor	1q42.12	600024	0.96184
LGI1	leucine rich glioma inactivated 1	10q23.33	604619	0.751227
LIAS	lipoic acid synthetase	4p14	607031	0.325177
LIG4	DNA ligase 4	13q33.3	601837	1
LMNB2	lamin B2	19p13.3	150341	0.991171
LRPPRC	leucine rich pentatricopeptide repeat containing	2p21	607544	1
MANBA	mannosidase beta	4q24	609489	1
MAP2K1	mitogen-activated protein kinase kinase 1	15q22.31	176872	1
MAP2K2	mitogen-activated protein kinase kinase 2	19p13.3	601263	0.997831
MAPK10	mitogen-activated protein kinase 10	4q21.3	602897	0.981293
MBD5	methyl-CpG binding domain protein 5	2q23.1	611472	0.967428
MBOAT7	membrane bound O-acyltransferase domain containing 7	19q13.42	606048	0.855873
MCCC1	methylcrotonoyl-CoA carboxylase 1	3q27.1	609010	0.892465
MCCC2	methylcrotonoyl-CoA carboxylase 2	5q13.2	609014	0.948571
MCOLN1	mucolipin 1	19p13.2	605248	1
MCPH1	microcephalin 1	8p23.1	607117	0.722559
MDH2	malate dehydrogenase 2	7q11.23	154100	0.40231
ME2	malic enzyme 2	18q21.2	154270	0.996867
MECP2	methyl-CpG binding protein 2	Xq28	300005	0.993869
MED12	mediator complex subunit 12	Xq13.1	300188	1
MED17	mediator complex subunit 17	11q21	603810	1
MED23	mediator complex subunit 23	6q23.2	605042	0.818458
MEF2C	myocyte enhancer factor 2C	5q14.3	600662	0.966698
MFSD8	major facilitator superfamily domain containing 8	4q28.2	611124	0.906156
MGAT2	mannosyl (alpha-1,6-)-glycoprotein beta-1,2-N-acetylglucosaminyltransferase	14q21.3	602616	1
MGME1	mitochondrial genome maintenance exonuclease 1	20p11.23	615076	0.88
MLC1	megalencephalic leukoencephalopathy with subcortical cysts 1	22q13.33	605908	0.9871
MMACHC	methylmalonic aciduria (cobalamin deficiency) cblC type, with homocystinuria	1p34.1	609831	0.951803
MMADHC	methylmalonic aciduria and homocystinuria, cblD type	2q23.2	611935	1
MOCS2	molybdenum cofactor synthesis 2	5q11.2	603708	0.500946
MOGS	mannosyl-oligosaccharide glucosidase	2p13.1	601336	0.926167
MPC1	mitochondrial pyruvate carrier 1	6q27	614738	0.71
MPDU1	mannose-P-dolichol utilization defect 1	17p13.1	604041	0.903264
MPI	mannose phosphate isomerase	15q24.1	154550	1
MRAP	melanocortin 2 receptor accessory protein	21q22.11	609196	1
MRPS22	mitochondrial ribosomal protein S22	3q23	605810	0.899855
MTO1	mitochondrial tRNA translation optimization 1	6q13	614667	0.999361
MTR	5-methyltetrahydrofolate-homocysteine methyltransferase	1q43	156570	0.986344
MTRR	5-methyltetrahydrofolate-homocysteine methyltransferase reductase	5p15.31	602568	1
NAA15	N(alpha)-acetyltransferase 15, NatA auxiliary subunit	4q31.1	608000	0.424409
NACC1	nucleus accumbens associated 1	19p13.13	610672	0.361074
NAGLU	N-acetyl-alpha-glucosaminidase	17q21.2	609701	0.939746
NARS2	asparaginyl-tRNA synthetase 2, mitochondrial (putative)	11q14.1	612803	0.907525
NDE1	nudE neurodevelopment protein 1	16p13.11	609449	0.979177
NDST1	N-deacetylase and N-sulfotransferase 1	5q33.1	600853	0.988393
NDUFA1	NADH:ubiquinone oxidoreductase subunit A1	Xq24	300078	0.611002
NDUFA2	NADH:ubiquinone oxidoreductase subunit A2	5q31.3	602137	0.291055
NDUFA8	NADH:ubiquinone oxidoreductase subunit A8	9q33.2	603359	0.250855
NDUFAF3	NADH:ubiquinone oxidoreductase complex assembly factor 3	3p21.31	612911	0.869474
NDUFAF6	NADH:ubiquinone oxidoreductase complex assembly factor 6	8q22.1	612392	0.87
NDUFB8	NADH:ubiquinone oxidoreductase subunit B8	10q24.31	602140	0.89563
NDUFS1	NADH:ubiquinone oxidoreductase core subunit S1	2q33.3	157655	0.995546
NDUFS3	NADH:ubiquinone oxidoreductase core subunit S3	11p11.2	603846	0.878168
NDUFS4	NADH:ubiquinone oxidoreductase subunit S4	5q11.2	602694	1
NDUFS7	NADH:ubiquinone oxidoreductase core subunit S7	19p13.3	601825	0.925962
NDUFS8	NADH:ubiquinone oxidoreductase core subunit S8	11q13.2	602141	0.501722
NDUFV1	NADH:ubiquinone oxidoreductase core subunit V1	11q13.2	161015	0.960094
NECAP1	NECAP endocytosis associated 1	12p13.31	611623	1
NEU1	neuraminidase 1	6p21.33	608272	0.916314
NF1	neurofibromin 1	17q11.2	613113	0.976327
NGLY1	N-glycanase 1	3p24.2	610661	1
NIPA2	non imprinted in Prader-Willi/Angelman syndrome 2	15q11.2	608146	0.966732
NIPBL	NIPBL, cohesin loading factor	5p13.2	608667	0.969849
NODAL	nodal growth differentiation factor	10q22.1	601265	1
NOTCH3	notch 3	19p13.12	600276	0.922127
NPC1	NPC intracellular cholesterol transporter 1	18q11.2	607623	0.931089
NPC2	NPC intracellular cholesterol transporter 2	14q24.3	601015	1
NPHP1	nephrocystin 1	2q13	607100	0.900072
NPRL2	NPR2-like, GATOR1 complex subunit	3p21.31	607072	0.900845
NPRL3	NPR3 like, GATOR1 complex subunit	16p13.3	600928	0.988464
NRAS	neuroblastoma RAS viral oncogene homolog	1p13.2	164790	0.973015
NRXN1	neurexin 1	2p16.3	600565	1
NSDHL	NAD(P) dependent steroid dehydrogenase-like	Xq28	300275	0.983711
NTRK2	neurotrophic receptor tyrosine kinase 2	9q21.33	600456	0.645783
NUBPL	nucleotide binding protein like	14q12	613621	0.997791
OCLN	occludin	5q13.2	602876	0.978561
OFD1	OFD1, centriole and centriolar satellite protein	Xp22.2	300170	0.941705
OPA1	OPA1, mitochondrial dynamin like GTPase	3q29	605290	1
OPHN1	oligophrenin 1	Xq12	300127	1
OTUD6B	OTU domain containing 6B	8q21.3	612021	0.613013
PACS1	phosphofurin acidic cluster sorting protein 1	11q13.1-q13.2	607492	0.914051
PACS2	phosphofurin acidic cluster sorting protein 2	14q32.33	610423	0.786593
PAFAH1B1	platelet activating factor acetylhydrolase 1b regulatory subunit 1	17p13.3	601545	0.964192
PAK3	p21 (RAC1) activated kinase 3	Xq23	300142	1
PANK2	pantothenate kinase 2	20p13	606157	0.836387
PARS2	prolyl-tRNA synthetase 2, mitochondrial (putative)	1p32.3	612036	0
PAX6	paired box 6	11p13	607108	0.987628
PC	pyruvate carboxylase	11q13.2	608786	1
PCCB	propionyl-CoA carboxylase beta subunit	3q22.3	232050	0.980919
PCDH12	protocadherin 12	5q31.3	605622	0.990031
PCDH19	protocadherin 19	Xq22.1	300460	0.972585
PDHX	pyruvate dehydrogenase complex component X	11p13	608769	0.976173
PEX1	peroxisomal biogenesis factor 1	7q21.2	602136	1
PEX10	peroxisomal biogenesis factor 10	1p36.32	602859	1
PEX12	peroxisomal biogenesis factor 12	17q12	601758	1
PEX13	peroxisomal biogenesis factor 13	2p15	601789	1
PEX14	peroxisomal biogenesis factor 14	1p36.22	601791	1
PEX16	peroxisomal biogenesis factor 16	11p11.2	603360	1
PEX19	peroxisomal biogenesis factor 19	1q23.2	600279	0.94609
PEX2	peroxisomal biogenesis factor 2	8q21.13	170993	0.964786
PEX26	peroxisomal biogenesis factor 26	22q11.21	608666	1
PEX3	peroxisomal biogenesis factor 3	6q24.2	603164	0.964755
PEX5	peroxisomal biogenesis factor 5	12p13.31	600414	0.957972
PEX6	peroxisomal biogenesis factor 6	6p21.1	601498	0.936054
PEX7	peroxisomal biogenesis factor 7	6q23.3	601757	1
PGK1	phosphoglycerate kinase 1	Xq21.1	311800	1
PGM1	phosphoglucomutase 1	1p31.3	171900	1
PHF6	PHD finger protein 6	Xq26.2	300414	0.931543
PIGA	phosphatidylinositol glycan anchor biosynthesis class A	Xp22.2	311770	0.878055
PIGC	phosphatidylinositol glycan anchor biosynthesis class C	1q24.3	601730	0.725931
PIGG	phosphatidylinositol glycan anchor biosynthesis class G	4p16.3	616918	0.919321
PIGH	phosphatidylinositol glycan anchor biosynthesis class H	14q24.1	600154	0.607353
PIGN	phosphatidylinositol glycan anchor biosynthesis class N	18q21.33	606097	0.99635
PIGO	phosphatidylinositol glycan anchor biosynthesis class O	9p13.3	614730	0.965902
PIGP	phosphatidylinositol glycan anchor biosynthesis class P	21q22.13	605938	0.730402
PIGT	phosphatidylinositol glycan anchor biosynthesis class T	20q13.12	610272	1
PIGV	phosphatidylinositol glycan anchor biosynthesis class V	1p36.11	610274	0.263968
PIK3CA	phosphatidylinositol-4,5-bisphosphate 3-kinase catalytic subunit alpha	3q26.32	171834	0.989059
PIK3R2	phosphoinositide-3-kinase regulatory subunit 2	19p13.11	603157	0.853517
PLAA	phospholipase A2 activating protein	9p21.2	603873	0.462356
PLCB1	phospholipase C beta 1	20p12.3	607120	0.996516
PLP1	proteolipid protein 1	Xq22.2	300401	1
PMM2	phosphomannomutase 2	16p13.2	601785	0.993336
PNKP	polynucleotide kinase 3'-phosphatase	19q13.33	605610	1
POMGNT1	protein O-linked mannose N-acetylglucosaminyltransferase 1 (beta 1,2-)	1p34.1	606822	1
POMT1	protein O-mannosyltransferase 1	9q34.13	607423	1
POMT2	protein O-mannosyltransferase 2	14q24.3	607439	0.952895
PPP3CA	protein phosphatase 3 catalytic subunit alpha	4q24	114105	0.915568
PPT1	palmitoyl-protein thioesterase 1	1p34.2	600722	1
PQBP1	polyglutamine binding protein 1	Xp11.23	300463	0.710655
PRICKLE1	prickle planar cell polarity protein 1	12q12	608500	0.966035
PRICKLE2	prickle planar cell polarity protein 2	3p14.1	608501	0.944881
PRIMA1	proline rich membrane anchor 1	14q32.12	613851	0.922621
PRODH	proline dehydrogenase 1	22q11.21	606810	0.896215
PROSC	proline synthetase cotranscribed homolog (bacterial)	8p11.23	604436	0.709135
PSAP	prosaposin	10q22.1	176801	0.917397
PSEN1	presenilin 1	14q24.2	104311	0.965645
PTCH1	patched 1	9q22.32	601309	0.980125
PTEN	phosphatase and tensin homolog	10q23.31	601728	0.958836
PTPN11	protein tyrosine phosphatase, non-receptor type 11	12q24.13	176876	0.935494
PURA	purine rich element binding protein A	5q31.3	600473	0.961284
QARS	glutaminyl-tRNA synthetase	3p21.31	603727	1
RAB11A	RAB11A, member RAS oncogene family	15q22.31	605570	0.125857
RAB11B	RAB11B, member RAS oncogene family	19p13.2	604198	0.362523
RAB39B	RAB39B, member RAS oncogene family	Xq28	300774	1
RAB3GAP1	RAB3 GTPase activating protein catalytic subunit 1	2q21.3	602536	1
RAC1	ras-related C3 botulinum toxin substrate 1 (rho family, small GTP binding protein Rac1)	7p22.1	602048	0.485269
RAF1	Raf-1 proto-oncogene, serine/threonine kinase	3p25.2	164760	1
RAI1	retinoic acid induced 1	17p11.2	607642	1
RARS2	arginyl-tRNA synthetase 2, mitochondrial	6q15	611524	0.923604
RBFOX1	RNA binding protein, fox-1 homolog 1	16p13.3	605104	0.67027
RBSN	rabenosyn, RAB effector	3p25.1	609511	1
RELN	reelin	7q22.1	600514	0.986641
RFT1	RFT1 homolog	3p21.1	611908	1
RHOBTB2	Rho related BTB domain containing 2	8p21.3	607352	0.905629
RMND1	required for meiotic nuclear division 1 homolog	6q25.1	614917	0.920315
RNASEH2A	ribonuclease H2 subunit A	19p13.13	606034	1
RNASEH2B	ribonuclease H2 subunit B	13q14.3	610326	1
RNASEH2C	ribonuclease H2 subunit C	11q13.1	610330	0.980135
RNASET2	ribonuclease T2	6q27	612944	0.899178
RORA	RAR related orphan receptor A	15q22.2	600825	0.774366
RPGRIP1L	RPGRIP1 like	16q12.2	610937	0.978513
RRM2B	ribonucleotide reductase regulatory TP53 inducible subunit M2B	8q22.3	604712	1
RTTN	rotatin	18q22.2	610436	0.998032
SACS	sacsin molecular chaperone	13q12.12	604490	0.988055
SAMHD1	SAM and HD domain containing deoxynucleoside triphosphate triphosphohydrolase 1	20q11.23	606754	0.505955
SCARB2	scavenger receptor class B member 2	4q21.1	602257	1
SCN3A	sodium voltage-gated channel alpha subunit 3	2q24.3	182391	0.977926
SCN8A	sodium voltage-gated channel alpha subunit 8	12q13.13	600702	0.948092
SCO2	SCO2, cytochrome c oxidase assembly protein	22q13.33	604272	1
SDHA	succinate dehydrogenase complex flavoprotein subunit A	5p15.33	600857	0.976808
SERPINI1	serpin family I member 1	3q26.1	602445	0.977916
SETBP1	SET binding protein 1	18q12.3	611060	0.998091
SGCE	sarcoglycan epsilon	7q21.3	604149	1
SGSH	N-sulfoglucosamine sulfohydrolase	17q25.3	605270	1
SHANK3	SH3 and multiple ankyrin repeat domains 3	22q13.33	606230	0.944099
SHH	sonic hedgehog	7q36.3	600725	0.259302
SHOC2	SHOC2, leucine rich repeat scaffold protein	10q25.2	602775	1
SIK1	salt inducible kinase 1	21q22.3	605705	1
SIX3	SIX homeobox 3	2p21	603714	1
SLC11A1	solute carrier family 11 member 1	2q35	600266	0.88563
SLC12A5	solute carrier family 12 member 5	20q13.12	606726	0.75107
SLC13A5	solute carrier family 13 member 5	17p13.1	608305	0.869565
SLC16A2	solute carrier family 16 member 2	Xq13.2	300095	0.955962
SLC17A5	solute carrier family 17 member 5	6q13	604322	1
SLC1A2	solute carrier family 1 member 2	11p13	600300	0.967254
SLC1A3	solute carrier family 1 member 3	5p13.2	600111	1
SLC25A12	solute carrier family 25 member 12	2q31.1	603667	0.97203
SLC25A13	solute carrier family 25 member 13	7q21.3	603859	0.997338
SLC25A19	solute carrier family 25 member 19	17q25.1	606521	0.882985
SLC25A20	solute carrier family 25 member 20	3p21.31	613698	1
SLC25A22	solute carrier family 25 member 22	11p15.5	609302	0.896994
SLC2A3	solute carrier family 2 member 3	12p13.31	138170	1
SLC35A1	solute carrier family 35 member A1	6q15	605634	0.990469
SLC35A2	solute carrier family 35 member A2	Xp11.23	314375	1
SLC35A3	solute carrier family 35 member A3	1p21.2	605632	0.951706
SLC35C1	solute carrier family 35 member C1	11p11.2	605881	0.938832
SLC45A1	solute carrier family 45 member 1	1p36.23	605763	0.860016
SLC4A10	solute carrier family 4 member 10	2q24.2	605556	0.976647
SLC6A1	solute carrier family 6 member 1	3p25.3	137165	0.968026
SLC6A4	solute carrier family 6 member 4	17q11.2	182138	1
SLC6A5	solute carrier family 6 member 5	11p15.1	604159	1
SLC9A6	solute carrier family 9 member A6	Xq26.3	300231	1
SMARCA1	SWI/SNF related, matrix associated, actin dependent regulator of chromatin, subfamily a, member 1	Xq25-q26.1	300012	0.972431
SMARCA2	SWI/SNF related, matrix associated, actin dependent regulator of chromatin, subfamily a, member 2	9p24.3	600014	0.968954
SMC1A	structural maintenance of chromosomes 1A	Xp11.22	300040	1
SMC3	structural maintenance of chromosomes 3	10q25.2	606062	0.954761
SMPD1	sphingomyelin phosphodiesterase 1	11p15.4	607608	1
SMS	spermine synthase	Xp22.11	300105	0.929387
SNAP25	synaptosome associated protein 25	20p12.2	600322	0.921544
SNIP1	Smad nuclear interacting protein 1	1p34.3	608241	1
SNX27	sorting nexin family member 27	1q21.3	611541	0.978077
SOS1	SOS Ras/Rac guanine nucleotide exchange factor 1	2p22.1	182530	0.999299
SPATA5	spermatogenesis associated 5	4q28.1	613940	1
SPG7	SPG7, paraplegin matrix AAA peptidase subunit	16q24.3	602783	0.874808
SPRED1	sprouty related EVH1 domain containing 1	15q14	609291	0.978285
SPTAN1	spectrin alpha, non-erythrocytic 1	9q34.11	182810	0.92046
SRD5A3	steroid 5 alpha-reductase 3	4q12	611715	0.96001
SRPX2	sushi repeat containing protein, X-linked 2	Xq22.1	300642	1
ST3GAL3	ST3 beta-galactoside alpha-2,3-sialyltransferase 3	1p34.1	606494	0.858691
ST3GAL5	ST3 beta-galactoside alpha-2,3-sialyltransferase 5	2p11.2	604402	0.99265
STAMBP	STAM binding protein	2p13.1	606247	1
STIL	SCL/TAL1 interrupting locus	1p33	181590	1
STRADA	STE20-related kinase adaptor alpha	17q23.3	608626	1
STX1B	syntaxin 1B	16p11.2	601485	0.966193
STXBP1	syntaxin binding protein 1	9q34.11	602926	0.93536
SUCLA2	succinate-CoA ligase ADP-forming beta subunit	13q14.2	603921	1
SUMF1	sulfatase modifying factor 1	3p26.1	607939	0.937954
SUOX	sulfite oxidase	12q13.2	606887	0.926132
SURF1	SURF1, cytochrome c oxidase assembly factor	9q34.2	185620	0.916519
SYN1	synapsin I	Xp11.3-p11.23	313440	0.874963
SYNGAP1	synaptic Ras GTPase activating protein 1	6p21.32	603384	1
SYNJ1	synaptojanin 1	21q22.11	604297	0.917874
SYP	synaptophysin	Xp11.23	313475	0.968
SZT2	seizure threshold 2 homolog (mouse)	1p34.2	615463	0.959186
TACO1	translational activator of cytochrome c oxidase I	17q23.3	612958	0.88177
TBC1D24	TBC1 domain family member 24	16p13.3	613577	1
TBC1D7	TBC1 domain family member 7	6p24.1	612655	0.953151
TBCD	tubulin folding cofactor D	17q25.3	604649	0.81503
TBCK	TBC1 domain containing kinase	4q24	616899	1
TBX1	T-box 1	22q11.21	602054	0.874541
TCF4	transcription factor 4	18q21.2	602272	0.981461
TDP2	tyrosyl-DNA phosphodiesterase 2	6p22.3	605764	0.892068
TGIF1	TGFB induced factor homeobox 1	18p11.31	602630	0.718612
TK2	thymidine kinase 2, mitochondrial	16q21	188250	0.94812
TMEM165	transmembrane protein 165	4q12	614726	0.897424
TMEM67	transmembrane protein 67	8q22.1	609884	0.584172
TMEM70	transmembrane protein 70	8q21.11	612418	1
TMTC3	transmembrane and tetratricopeptide repeat containing 3	12q21.32	617218	0.866116
TPK1	thiamin pyrophosphokinase 1	7q35	606370	1
TPP1	tripeptidyl peptidase 1	11p15.4	607998	0.860065
TRAK1	trafficking kinesin protein 1	3p22.1	608112	0.863603
TREX1	three prime repair exonuclease 1	3p21.31	606609	0.859846
TRPM6	transient receptor potential cation channel subfamily M member 6	9q21.13	607009	1
TSC1	tuberous sclerosis 1	9q34.13	605284	0.995598
TSC2	tuberous sclerosis 2	16p13.3	191092	0.886259
TSEN2	tRNA splicing endonuclease subunit 2	3p25.2	608753	0.886728
TSEN34	tRNA splicing endonuclease subunit 34	19q13.42	608754	0.955381
TSEN54	tRNA splicing endonuclease subunit 54	17q25.1	608755	0.836257
TUBA1A	tubulin alpha 1a	12q13.12	602529	0.939965
TUBA8	tubulin alpha 8	22q11.21	605742	0.894421
TUBB	tubulin beta class I	6p21.33	191130	0.573699
TUBB2A	tubulin beta 2A class IIa	6p25.2	615101	0.825771
TUBB2B	tubulin beta 2B class IIb	6p25.2	612850	0.748173
TUBB3	tubulin beta 3 class III	16q24.3	602661	0.952548
TUBG1	tubulin gamma 1	17q21.2	191135	0.578491
TUSC3	tumor suppressor candidate 3	8p22	601385	0.977472
UBA5	ubiquitin like modifier activating enzyme 5	3q22.1	610552	0.827952
UBE3A	ubiquitin protein ligase E3A	15q11.2	601623	0.969515
UCHL1	ubiquitin C-terminal hydrolase L1	4p13	191342	1
UCN	urocortin	2p23.3	600945	0.805423
VANGL1	VANGL planar cell polarity protein 1	1p13.1	610132	0.992697
VARS2	valyl-tRNA synthetase 2, mitochondrial	6p21.33	612802	0.797566
VDAC1	voltage dependent anion channel 1	5q31.1	604492	0.806019
VPS13A	vacuolar protein sorting 13 homolog A	9q21.2	605978	1
VPS13B	vacuolar protein sorting 13 homolog B	8q22.2	607817	0.985507
VRK1	vaccinia related kinase 1	14q32.2	602168	0.919935
WDR26	WD repeat domain 26	1q42.11-q42.12	617424	0.975663
WDR45	WD repeat domain 45	Xp11.23	300526	1
WDR62	WD repeat domain 62	19q13.12	613583	0.997838
WNK1	WNK lysine deficient protein kinase 1	12p13.33	605232	0.970945
WWOX	WW domain containing oxidoreductase	16q23.1-q23.2	605131	0.785435
YWHAG	tyrosine 3-monooxygenase/tryptophan 5-monooxygenase activation protein gamma	7q11.23	605356	0.449186
ZEB2	zinc finger E-box binding homeobox 2	2q22.3	605802	0.982982
ZIC2	Zic family member 2	13q32.3	603073	0.596398
ZSWIM6	zinc finger SWIM-type containing 6	5q12.1	615951	0.48704
