# Supplementary material for: Diagnostic Yield and Treatment Impact of Targeted Exome Sequencing in Early-Onset Epilepsy
Source: Front Neurol. 2019 May 21;10:434. doi: 10.3389/fneur.2019.00434 (PMC6536592; doi:10.3389/fneur.2019.00434)
Supplement: Supplementary file 2 [file Table_2.xlsx]

## Sheet: Table 2
Supplementary Table 2: Clinical features of all patients
Subject	Sex (M/F)	Parental Ancestry/ Country of origin (M/F)*	Age Last Seen	Age of Onset	Seizures types	Epilepsy	Treatment Resistant	ID/GDD/Autism/other	Family History	MRI	Other
001P	M	M – East Asian F - East Asian	18 mos	3 mos	Focal motor	Dravet	Yes	Mild speech/language delay	negative	9 mos : Normal
002R	M	M - Caucasian F - Caucasian	3 yr	3.2 mos	Focal motor	Dravet-like	Yes	GDD	Mat=migraines and epilepsy	9 mos and 3yr 5 mos: slightly thin CC	Mild hemiparesis
										3 yr 6 mos: left Hemisphere swelling; right atrophy
										3 yr 10 mos: bilateral atrophy (Left>Right)
003R	F	M - Unknown F - Unknown	6 yr	0.03 mos (day 1)	Focal motor to bilateral TC	EE	Yes	ADHD	Mat: febrile seizures	Day 3: normal	Perinatal: hypoglycemia & respiratory distress
										6 yr: prominent perivascular spaces
004R	F	M - Caucasian F - Caucasian	3 yr	20.1 mos	Focal motor	CSWS	Yes	Regression; language disorder	Mat: epilepsy	2 &3 yr: normal	Born at 34 weeks
									Pat: epilepsy
005R	F	M – East Asian F - East Asian	5 yr	7 mos	Epileptic Spasms	West syndrome	Yes	GDD/ID	Negative	1 & 9 yr: normal	Microcephaly, CVI, hypotonia, hyperkinetic movement disorder
006R	M	M - Caucasian F - Caucasian	4 yr	10.4 mos	Generalized	LGS	Yes	GDD/ID	Mat: epilepsy	3 yr: prominant extra-axial spaces	Macrocephaly, ataxia
007R	M	M - Caucasian F - Caucasian	4 yr	38.3 mos	Generalized	MAE	Yes	Mild speech/language delay	Mat: seizure	3 yr: normal
									Pat: school difficulties
010P	F	M - Unknown F - Unknown	3 yr	18.3 mos	Focal motor	Unclassified	Yes	GDD	Pat: epilepsy	2 yr: normal	In utero exposure; hypotonia
011R	F	M - Caucasian F - Caucasian	12 yr	24 mos	Focal motor	Unclassified	Yes	Anxiety/depression/OCD	Sibs: FS	8 & 12 yr: normal	migraine
									GPs: migraine
012R	M	M - Caucasian F - Caucasian	19 yr	3.4 mos	Epileptic spasms, Generalized	West to LGS	Yes	GDD/ID	Sibs: ADHD	4 mos; 2 & 3 yr: normal	CVI, spasticity, hyperkinetic movement disorder
013R	F	M - Indian, Pakistani or South Asian F - Indian, Pakistani or South Asian	12 yr	5 mos	epileptic spasms, generalize	EE	Yes	GDD regression/ID	parents: migraine	7 mos: Prominent ventricles and extra axial spaces 11 mos: Prominent extra-axial spaces and ventricular system 12 mos: In the setting of microcephaly, the findings are consistent with progressive atrophy. Delayed cerebral white matter myelination. 10 yr: Mild interval global volume loss	Passed away age 12 yr
014R	M	M – East Asian F - East Asian	15 yr	0.5 mos	epileptic spasms, focal and generalized	EE	Yes	GDD/ID	negative	4 yr: Diffuse and severe brain atrophy	vision impairment, sensorineural hearing loss, neuropathy
015P	M	M –Arabic or Middle eastern F - Arabic or Middle eastern	20 mos	5.4 mos	Epileptic spasms	West syndrome	Yes	GDD	Negative	7 mos: normal	Hypotonic
016R	F	M - Native or First Nations F - Native or First Nations	22 yr	24.4 mos	Focal and generalized	EE	Yes	GDD/ID/Autism/anxiety	Pat: epilepsy	8 & 14 yr: normal	Hypotonic, ataxia
017R	M	M - Unknown F - Unknown	9 yr	55.5 mos	Focal	Unclassified	Yes	mild motor and speech difficulties	Pat, brother: FS; mat cousin: epilepsy	5 yr: normal	macrocephaly
018P	F	M - Caucasian F - Caucasian	6 mos	1.7 mos	Focal epileptic spasms, tonic	Ohtahara, West	Yes	GDD	Negative	2 mos: normal	Facial dysmorphism, axial hypotonia, CVI, strabismus
019R	F	M- Unknown F- Unknown	12 yr	30 mos	Generalized	Unclassified	Yes	GDD/ID/Autism/ADHD/OCD	NA	2 & 10 yr: normal	VPA exposure in utero
											Facial dysmorphism, strabismus, bicuspic AV, scoliosis
020R	F	M - Caucasian F - Caucasian	12 yr	3 mos	Focal and generalized	Unclassified	Yes	GDD/ID	mat cousin: LD, migraine; 2 pat cousins epilepsy	4 mos & 2yr: normal	macrocephaly, hypotonia
023R	M	M - Portuguese F -French Canadian	12 yr	11.2 mos	Focal and Generalized	EE	Yes	GDD/ID	Consanguinity: 2nd degree	11 mos, 2 & 5 yr: left occipital lobe focal white matter signal abnormality	Hypotonic, ataxic; passed away at 12 yyears
024R	F	M - Caucasian F - Caucasian	11 yr	60 mos	Focal	LKS	Yes	GDD/ID/regression/ADHD	Adopted	8 yr: mild PVL	Born at 34 weeks
											In utero exposure
025R	M	M –Asian F - Asian	19 yr	5.1 mos	Focal	Unclassified	Yes	Mild LD, DCD, anxiety	Cousin: FS	5 mos, 8 & 13 yr: normal
026R	F	M - Caucasian F - Caucasian	5 yr	40 mos	Generalized	EE	Yes	GDD/ID	Mat: epilepsy	4 yr: normal
					Epileptic spasms				Parent: migraine
027R	F	M - Caucasian F - East Asian/Caucasian	2 yr	12.6 mos	Focal	GEFS+	Yes	normal	GP: epilepsy, FS	1.5 yr: normal
					Generalized				Sibs: ID
029R	M	M - Caucasian F - Caucasian	16 yr	2.8 mos	Focal	Unclassified	Yes	GDD/ ADHD/ ID	mat uncle: FS	2,4,5,10 yr: normal
030R	M	M - Unknown F - Unknown	7 yr	37.8 mos	Generalized Absence	Childhood absence epilepsy	Yes	OCD, ADHD	Pat: epilepsy	4 yr: normal
031R	F	M – East Asian F - East Asian	3 yr	18.6 mos	Generalized	Unclassified	No	normal	Negative	2.5 yr: normal
					Myoclonic absence
032R	F	M – East Asian F - East Asian	18 yr	3 mos	epileptic spasms, focal and generalized	West syndrome, LGS	Yes	GDD/ID/Autism	negative	2 yr: normal 5 yr: normal 12 yr: normal 15 yr: Mild cerebellar volume loss, generalised reduced cerebral volume/growth	macrocephaly, café au lait macules
033P	F	M - Caucasian F - Caucasian	16 mos	9.2 mos	Focal, EPC, myoclonic	EE	Yes	GDD, regression	Pat: FS	9 mos: normal	Liver failure, hypotonic
											Passed away 16 months
036P	M	M - Caucasian F - Caucasian	1 yr	6 mos	Generalized myoclonic	Unclassified	Yes	GDD	Negative	5 mos: thin CC, arachnoid cyst, basilar kyphosis	Polyhydramnios, postnatal hypoglycemia, hypotonic, cleft palate
037P	F	M - Caucasian F - Caucasian	6 yr	60 mos	Focal	Unclassified	No	GDD, ID, Autism	GP: epilepsy	7 yr: normal
038R	F	M - Indian, Pakistani or South Asian F - Indian, Pakistani or South Asian	7 yr	13 mos	Focal	Unclassified	Yes	GDD, ID	Negative	2 yr: Right MTLS	Microcephaly, atrial septal defect
					FS					3yr: same + atrophy right hemisphere	2 epilepsy surgeries for HS and FCD III
										4yr: surgical changes with adjacent signal abnormalities
										5yr: post 2nd surgical changes & early left HS
039R	M	M - Caucasian F - Caucasian	10 yr	0.03 mos (Day 1)	Focal	EE	Yes	GDD, ID, Autism	Negative	Day 3 &10: focal diffusion restriction left occipital lobe. 2 years: normal.	In utero seizures? Hypotonic, ataxic
040R	F	M – East Asian F - East Asian	3 yr	0.1 mos (Day 3)	Focal	EE	Yes	GDD, ID	Negative	Day 5: normal	Spasticity, CVI
										4 yr: white matter signal abnormality and volume loss in cerebral hemispheres
042R	M	M – East Asian F - East Asian	18 yr	14 mos	Febrile Seizures, Generalized	Epilepsy with myoclonic atonic seizures, Febrile seizures plus	Yes	GDD, regression	mat aunt: FS	4 yr: normal
043R	F	M - Indian, Pakistani or South Asian F - Indian, Pakistani or South Asian	2 yr	3 mos	Focal Epileptic spasms	West syndrome	No	GDD, ID	Negative	3 mos: lissencephaly posterior > anterior	Microcephaly
											CVI
											Hypotonic
044R	M	M - Indian, Pakistani or South Asian F - Indian, Pakistani or South Asian	5 yr	2.1 mos	Focal	EE	Yes	GDD, ID, regression	Paternal: epilepsy	7 weeks: normal	CVI, axial hypotonia, hyperkinetic movement disorder, feeding difficulties
										2 yr: atrophy; thin CC; abnormal myelination
										4 yr: progressive atrophy; abnormal signal BG, thalami
047P	F	M - Caucasian F - Caucasian	4 yr	44.2 mos	Generalized	Unclassified	Yes	Speech/language delay	Father, 2 sibs and Pat cousin: FS	Not done
					FS
049R	F	M - Caucasian F - Caucasian	4 yr	12.9 mos	Generalized focal FS	Febrile seizures plus	Yes	Speech/language delay	Pat: 2nd cousin seizure	2 yr: normal
050R	M	M - Caucasian F - Caucasian	3 yr	13.7 mos	Focal	Unclassified	Yes	GDD, ID	Negative	1 yr: complex asymmetric brain malformation	Strabismus, asymmetric pupils , hemiparesis, hemihypertrophy
										2 yr: same plus right HS
052R	F	M - Unknown F - Unknown	11 yr	2 mos	Focal	Unclassified	Yes	GDD/ Anxiety/ OCD/ Tics/ ID/ Autism	sibs-ID, anxiety, ASD; mat cousin-epilepsy	4 yr: Developmental anomaly of the posterior aspect of the parietal parafalcine cortex bilaterally, right subependymal heterotopia, right hippocampus mesial temporal sclerosis	hippocampal asymmetry
053R	M	M - Native or First Nations F - Native or First Nations	7 yr	10.4 mos	epileptic spasms, Focal	West syndrome	Yes	GDD	parents: development issues	11 mos: Possible right temporal corical dysplasia. Slightly smaller right hippocampus. 4 yr: cortical dysplasia in the anteromedial right temporal lobe/parahippocampal gyrus	possible in utero exposures
055R	F	M - Indian, Pakistani or South Asian F - Indian, Pakistani or South Asian	11 yr	7.1 mos	epileptic spasms, focal and generalized	West syndrome	Yes	GDD/ Aggressive behavior/ID	negative	7 mos: normal 4 yr: normal	congenital left ptosis
056R	M	M - Caucasian F - Caucasian	5 yr	32.5 mos	Generalized Absence	Unclassified	Yes	GDD	Pat: epilepsy	5 yr: normal	macrocephaly
057R	F	M –Arabic or Middle eastern F - Arabic or Middle eastern	19 mos	0.8 mos	Focal	Unclassified	Yes	GDD	Consanguinity: 1st degree	2 mos: abnormal CC; abnormal signal BG	Microcephaly, hypotonic
										6 mos: atrophy; abnormal white matter and BG signal
058R	M	M - Caucasian F - Caucasian	15 yr	14.9 mos	Focal	Unclassified	Yes	GDD/ ID/ Autism	mat uncle-GDD; mat cousin-ASD	3 yr: normal
059P	M	M - Unknown F - Unknown	3 yr	24 mos	Focal	Unclassified	Yes	GDD, Autism	Negative	18 mos: possible atrophy	Microcephaly
										2 yr: delayed myelination
060R	F	M - Caucasian F - Caucasian	13 yr	4.5 mos	epileptic spasms, Focal	West syndrome	Yes	GDD/ ADHD/ ID	negative	2 yr: normal	microcephaly
061R	F	M - Caucasian F - Caucasian	14 yr	5.2 mos	Generalized, focal FS	Dravet	Yes	GDD, ID	Brother: Dravet-like died	1 yr: normal	Microcephaly
									Mother, GP, Mat cousin: FS		Oromotor difficulties
											Ataxic/crouch gait
062R	M	M - Caucasian F - Caucasian	10 yr	59.3 mos	Generalized, focal	EE	yes	normal	Negative	5 yr: normal
063R	M	M - Caucasian F - Caucasian	3 yr	18.5 mos	Generalized absence myoclonic	Unclassified	Yes	GDD	Negative	2 yr: normal
064R	F	M - Caucasian F - Caucasian	28 yr	10.2 mos	Generalized, focal	LGS	Yes	GDD, ID	Negative	5 yr: normal
										13 yr: normal
065R	F	M - Caucasian F - Caucasian	3 yr	3.5 mos	Epileptic spasms	West syndrome	Yes	GDD	Negative	4 mos: delayed myelination	Premature (34 weeks); twin
										2 yr: Hypomyelination and atrophy	Dysmorphic, limb asymmetry
											Microcephaly, hypotonic, spasticity
066R	F	M - Caucasian F - Caucasian	18 yr	12 mos	Febrile Seizures, Focal	Unclassified	NA	GDD/ ID/ Autism	negative	12 yr: Bilateral symmetrical posterior white matter signal abnormality with atrophic splenium 13 yr: Bilateral symmetric white matter abnormalities associated with some volume loss.	ataxia
067R	M	M - Caucasian F - Caucasian	16 yr	18.1 mos	Generalized, focal, epileptic spasms, FS	LGS	Yes	GDD, ID, ASD	Paternal side: migraine and epilepsy	1 yr; 2 yr-normal
										6 yr: heterotopic grey
									Maternal: migraine	7yr: incomplete myelination and heterotopic grey
068R	M	M - Caucasian F - Caucasian	10 yr	35.6 mos	Focal	Unclassified	Yes	GDD/ ADHD/ ID	Parents, sibs: seizures	18 mos,3 & 8 yr: normal
069P	M	M - Caucasian F - Caucasian	5 yr	51.5 mos	Generalized	Unclassified	No	GDD, ID	Brother similarly affected	3 yr: normal	Spastic CP, dystonia, CVI, microcephaly, G-tube fed
					Tonic, tonic-clonic
071R	F	M - Indian, Pakistani or South Asian F - Indian, Pakistani or South Asian	7 yr	46.5 mos	Focal, FS	Unclassified	Yes	GDD, Autism	Negative	2 yr: delayed myelination small thoracic hydromyelia	Hypotonia, microcephaly, hand stereotypies, intermittent hyperventilation, minor anomalies, scoliosis
										4 yr: normal head hydromyelia smaller
										8 yr: normal head; minimal hydromelia
072R	M	M – East Asian F - East Asian	22 yr	29.2 mos	Focal	Unclassified	yes	ID/Autism/Anxiety	negative	3 & 11 yr: normal
073R	F	M - Unknown F - Unknown	20 yr	12 mos	Generalized	EE	Yes	mild GDD/ Anxiety/ ADHD/ ID	parents: migraine	3 yr; asymmetric brainstem	tremor
074R	M	M - Unknown F - Unknown	5 yr	44.5 mos	Generalized myoclonic, tonic	Unclassified	Yes	Normal	Negative	4 yr: prominent subarachnoid spaces	macrocephaly
075R	F	M - Unknown F - Unknown	20 yr	12 mos	Generalized, focal	EE	Yes	GDD, regression/ ID/ Autism	mat 2nd cousin-epilepsy, GDD; parents-depression	3,5,6,12 yr: normal
076R	M	M - Indian, Pakistani or South Asian F - Indian, Pakistani or South Asian	12 yr	36 mos	Febrile Seizures, Focal	EE	Yes	Speech/language; Gross/fine motor; Cognition	parents: miraine; pat uncle-epilepsy, ID	3,4,6,8 yr: normal
077R	F	M - Caucasian F - Caucasian	10 yr	2.1 mos	Epileptic spasms, focal, tonic-clonic	West syndrome, LGS	Yes	GDD/ID	negative	2, 4, 10 mos: normal	Progressive microcephaly
										1 year: possible atrophy	CVI, spastic CP, hyperkinetic movement disorder, cyclic vomiting
										4 yr: normal except post epilepsy surgery changes
079R	F	M - Unknown F - Unknown	6 yr	4 mos	epileptic spasms, Focal	West syndrome	Yes	GDD/ID	negative	6 mos: The findings are suggestive of microcephaly with a bulky corpus callosum 4 yr: Nonspecific abnormalities as described	microcephaly, CVI, spastic CP
080R	M	M - Caucasian F - Caucasian	21 yr	27.5 mos	Focal	Unclassified	Yes	GDD/ ID/ Autism/ ADHD	Father: tremor; mat cousin: seizure	2,4 & 13 yr: normal	scoliosis
082R	M	M - Unknown F - Unknown	8 yr	51.4 mos	Focal	EE	Yes	GDD, regression/ Anxiety/ major behavioral issues / ID/ Autism	Mother, mat aunt, MGM: mood disorders	4 yr: normal
083R	M	M - Caucasian F - Caucasian	33 yr	46 mos	Generalized, focal	LGS	Yes	GDD, regression/ Aggressive behavior, OCD/ ID	negative	5 & 7 yr: normal
084R	M	M - Unkown F - Caucasian	10 yr	41 mos	Focal	EE	Yes	ID	mat aunt: FS	5 yr: normal
086R	F	M - Unknown F - Unknown	16 yr	52 mos	Focal	CSWS	Yes	moderate ID/ Anxiety/ Autism	parent, sibling: mood disorder	10 yr: Bilateral thalamic encephalomalacic cavities
087R	F	M – East Asian F - East Asian	2 yr	8.4 mos	Generalized, focal, tonic-clonic, myoclonic	Unclassified	Yes	GDD, ID	Negative	9 mos: normal	Episode of status epilepticus associated with significant brain edema with worsening development, cerebral palsy and CVI; GJ tube fed
										2 yr: diffuse cerebral edema
089R	M	M - Caucasian F - Caucasian	15 yr	36 mos	Generalized, focal	Unclassified	Yes	GDD/ ADHD/ ID	parent: migraine, delay, mood disorder	5 yr: normal 9 yr: Mildly prominent extra-axial spaces.	32 weeks gestation, macrocephaly, asthma
090R	F	M - Indian, Pakistani or South Asian F - Caucasian	13 yr	0.23 mos (Week 1)	epileptic spasms, Focal	West syndrome, LGS	Yes	GDD/ID	mat aunt: FS	1 mos: normal 3 yr: normal 6 yr: Minor asymmetricly increased T2 signal within the right anterior temporal lobe and the right uncus.	cerebral palsy, dystonia, asthma
091R	M	M - Caucasian F - Caucasian	13 yr	4.3 mos	Focal	Unclassified	Yes	GDD/ID	mat aunt, cousin: seizure	2 yr: There are tiny residual basal ganglia with areas of cystic destruction in the lentiform nuclei and through the internal capsule. The thalami are markedly reduced in size. Both cerebral hemispheres demonstrate extensive symmetric multicystic encephalomalacia with only residual minimal areas of white matter remaining in both hemispheres.	cerebral palsy, microcephaly, CVI
092R	F	M - Caucasian F - Caucasian	10 yr	30.4 mos	Generalized, Epileptic spasms	EE	Yes	GDD/ID	mat cousin: GDD, microcephaly, movement disorder	4 yr: MR brain scan showing features suggesting mild cerebellar atrophy	microcephaly, hyperkinetic movement disorder
093R	F	M - Unknown F - Unknown	10 yr	21.4 mos	Generalized, Focal, Febrile seizures	EE	Yes	GDD/ID	pat cousin: seizure	7 yr: normal	Failure to thrive
094R	F	M - Caucasian F - Caucasian	18 yr	7 mos	Generalized, Focal	Dravet	Yes	mild (Cognition)	GP: seizure	3 yr: normal
098P	M	M - Unknown F - Unknown	4 yr	1.5 mos	Focal	Unclassified	Yes	GDD	mat 2nd cousin: dystonia	3 mos: Focal left cerebellar encephalomalacia
099R	F	M - Unknown F - Unknown	10 yr	17.5 mos	Focal	Unclassified	no	Anxiety	negative	2 & 5 yr: normal	tremor; GERD
100R	F	M - Caucasian F - Caucasian	23 yr	10.1 mos	Focal, Febrile Seizures	Unclassified	yes	GDD/ID	pat uncle: migraine	17 yr: normal	alternating hemiplegia, hyperkinetic movements, ataxia, scoliosis
101R	F	M - Unknown F - Unknown	13 yr	11 mos	Focal	EE	Yes	school difficulties, anxiety	parent, GP: migraine; mat uncle: seizure	10 yr: nonspecific finding: focus of high T2/FLAIR signal within the deep left temporal white matter	migraine
102R	M	M - Unknown F - Unknown	7 yr	15.5 mos	Focal	Unclassified	Yes	mild (Speech/language)/ Autism	mat cousin: seizure; parent/sib: GDD; mother: mood disorder	3 yr: normal	macrocephaly
103P	F	M - Unknown F - Unknown	8 yr	50.4 mos	Generalized, focal	Unclassified	Yes	mild (Speech/language)	Father: single febrile seizure, Mother: migraine, asthma	4 yr: normal
104P	M	M - Unknown F - Unknown	6 mos	0.9 mos	Focal	SLFNE	No	Normal	Neonatal seizure: mother, Mat uncle, grandmother, & first cousin	Not done	GERD
105R	F	M - Caucasian F - Caucasian	15 yr	21.5 mos	Generalized	Unclassified	Yes	GDD	GM: migraine; sib, GP: seizure; pat aunt: GDD	2,3 & 10 yr: normal	tremor
106R	F	M - Unknown F - Unknown	17 yr	3.7 mos	Focal	EE	Yes	GDD, ID	Maternal aunt: epilepsy and died in infancy	2 yr: normal	Cerebral palsy, exotropia, scoliosis
										4 yr: nonspecific abnormal white matter signal
										8 yr: normal
107R	F	M - Unknown F - Caucasian	19 yr	60 mos	Generalized, focal	CSWS	Yes	GDD, regression/ ID/ADD	MGM: epilepsy	10 yr: normal	macrocephaly
108R	F	M - Caucasian F - Caucasian	17 yr	24.6 mos	Focal	Unclassified	yes	mild motor, school dificulties	negative	3 & 5 yr: normal	migraine
109R	F	M - Unknown F - Unknown	9 yr	22.4 mos	Epileptic spasms, generalized	West syndrome	Yes	mild GDD; regression/ ID/Aggressive behavior	negative	2 & 4 yr: normal	migraine
113R	F	M - Caucasian F - Caucasian	8 yr	7.5 mos	Focal, Epileptic Spasms	West syndrome	Yes	GDD	negative	8 mos: diffuse cortical malformation and associated abnormal white matter 3 yr: diffuse cortical malformation of cerebral hemispheres with associated delayed myelination 5 yr: Progressive cerebral and cerebellar volume loss which is predominantly of the deep white matter	spastic CP, GERD
114R	M	M - Caucasian F - Caucasian	8 yr	35 mos	Generalized	MAE	Yes	normal	mat 2nd cousin-epilepsy, ASD	3 yr: normal
115R	F	M - Caucasian F - Caucasian	17 yr	48 mos	Generalized	Unclassified	Yes	GDD/ID	negative	1,2 & 11 yr: normal	microcephaly,
116R	M	M - Caucasian F - Caucasian	8 yr	41.3 mos	Febrile Seizures, Generalized	MAE	Yes	mild (cognition; emotion)/ Aggressive behavior/ ADHD	Twin brother: same epilepsy; Father and his twin: FS, pat 2nd cousin: seizure; mat uncle: LD	4 & 5 yr: normal
117R	F	M – East Asian F - East Asian	8 yr	37 mos	Focal	Unclassified	Yes	GDD/ ASD	pat cousin: FS, pat cousin: speech/language delay	4 yr 1 mos: Focal cortical dysplasia of the right anterior/mesial temporal lobe predominately involving the para hippocampal gyrus and anterior temporal pole, as described. Right mesial temporal sclerosis. 4 yr 5 mos: Unchanged appearance of right anterior and mesial temporal lobe 8 yr: right anterior and mesial temporal lobe has improved. There is stable right mesial temporal sclerosis.
118P	M	M - Unknown F - Unknown	4 yr	9.5 mos	Focal	Unclassified	no	GDD/ Anxiety	pat cousin: seizure/ASD; PGM: seizure	10 mos: normal
119R	M	M –Latino or Hispanic F - Latino or Hispanic	13 yr	21.2 mos	Febrile Seizures, Generalized	Unclassified	no	GDD/ ID/ ADHD	negative	3 yr: normal 6 yr: normal 12 yr: focal 1.3 cm right-sided thalamic abnormal 12 yr: unchanged from above. signal intensity within the left cerebellum 12 yr: Indeterminate lesions demonstrated within the right thalamus and left cerebellum are unchanged in size and appearance.	34 weeks gestation, GERD, possible meningitis age 2
120P	F	M - French Canadian F - Caucasian/ Native or First Nations	7 mos	1.8 mos	Epileptic spasms	West syndrome	Yes	GDD	Negative	2 mos: swelling frontal and parietal gyri, diffusely abnormal white matter signal	Microcephaly, hypotonia, hyperkinetic movement disorder
											Passed away 16 months
122R	F	M - Caucasian F - Black or African	15 yr	48.5 mos	Focal and Generalized	EE	Yes	GDD/ID/anxiety	Father, PGM, pat aunt: migraine, maternal 2nd cousin: GDD, pat cousin: speech/language delay	4 yr: normal	migraine
123R	F	M - Caucasian F - Caucasian	11 yr	11.8 mos	Focal and Generalized	EE	Yes	GDD/ID/ASD	Parents: seizures; mat cousin: GDD	2 yr: mild PVL, arrested hydrocephalus or benign megalencephaly 4 yr: no change from above. Nonspecific mild dilatation of ventricles	28 weeks gestation-macrocephaly with arrested hydrocephalus; twin pregnancy
124R	F	M - Unknown F - Unknown	8 yr	19.2 mos	Focal	Unclassified	Yes	GDD/ID	negative	1 yr: Bilateral frontal lobe polymicrogyria.
125P	F	M – East Asian F - East Asian	5 mos	0.7 mos	Focal	EE	Yes	borderline to normal development	Paternal uncle FS; paternal cousin epilepsy	Day 5: abnormal white matter signal in both cerebral hemispheres, restricted diffusion in basal ganglia and thalami, swelling of pons, mild lactate peak	Low Apgar scores, sensorineural hearing loss,
										Day 13: bilateral white matter signal abnormality in cerebral hemispheres; abnormal signal in basal ganglia and thalami	G-tube fed
126R	F	M - Caucasian F - Caucasian	18 yr	60 mos	Generalized	Unclassified	Yes	ID	parents: migraine	11 yr: normal
127R	F	M – East Asian F - East Asian	5 yr	5.4 mos	Focal	Unclassified	Yes	ID	negative	6 mos: normal	hypotonic
128P	M	M - Caucasian F - Caucasian	4 yr	2.9 mos	Focal and Generalized	Unclassified	Yes	NA	parents: seizure	3 mos: normal
129P	M	M - Unknown F - Unknown	4 yr	6.4 mos	epileptic spasms, generalized	West syndrome	no	normal	mat uncle: seizure	7 mos: normal
130R	F	M - Caucasian F - Caucasian	22 yr	1.1 mos	epileptic spasms	West syndrome	Yes	GDD/ID/Autism	Pat aunt, cousin: epilepsy; sibs: GDD	3 yr: normal 6 yr: tiny lipoma midline below hypothalamus 9 yr: normal 15 yr: tiny lipoma as described. Normal	catatonia
131P	M	M - Native or First Nations F - Native or First Nations	3 yr	5.1 mos	Focal	SLFIE	Yes	mild speech/language delay	NA	5 mos: normal
132R	M	M - Unknown F - Unknown	9 yr	28.1 mos	Focal	CSWS	Yes	Speech/language/ID/Autism	Mother, MGF: dyslexia, learning disorder	3 yr: normal 6 yr: periventricular heterotopia right frontal horn 7 yr: subependymal heterotopia adjacent to the right frontal horn 9 yr: Right anterior frontal resection
133R	M	M – East Asian F - East Asian	17 yr	10 mos	Focal, Generalized, Febrile Seizures	EE	Yes	GDD/ID/ASD	negative	11 yr: normal
134P	F	M - Native or First Nations F - Native or First Nations	4 yr	13.4 mos	Generalized, focal	Unclassified	Yes	NA	mat aunt: seizure	17 mos: normal
135R	F	M - Unknown F - Unknown	15 yr	6 mos	epileptic spasms	West syndrome	Yes	GDD/ ID	maternal: migraine; pat aunt: seizure	2 yr: normal 10 yr: normal	spastic CP
136R	M	M - Caucasian F - Caucasian	15 yr	12.6 mos	Focal	Unclassified	no	normal	mother, MGM, Father: déjà vu	10 mos: normal
137R	F	M - Caucasian F - Unknown	11 yr	24 mos	Generalized, focal	Unclassified	No	GDD/ID	negative	5 yr: asymmetry mild ventriculomegaly and one punctate white matter signal abnormality
138R	F	M - Jewish F - Jewish	22 yr	18 mos	Generalized, focal	EE	Yes	GDD/ID/ASD/anxiety	parent, GP: migraine	8 yr: double cerebral cortex and hypoplastic cerebellar vermis. 14 yr: Preoperative localization for callosotomy. 14 yr: Callosotomy in this patient with band heterotopia. 20 yr: The corpus callosotomy again appears complete,
139R	M	M - Black or African F - Caucasian	12 yr	10 mos	Focal	Unclassified	Yes	GDD/ID/ASD/ADHD	MG uncle: autism; half-sib: speech/language delay; sib and GP: mood disorder	2 yr: Asymmetric lateral ventricles 7 yr: Stable lateral ventricular asymmetry
140P	F	M - Caucasian F - Caucasian	6 yr	38.3 mos	Generalized	EE	Yes	mild	twin, cousin: speech/language delay	3 yr: normal	Twin B, hypotonia
141R	F	M – East Asian F - East Asian	12 yr	9 mos	Focal, Febrile Seizures	Unclassified	Yes	GDD/ ID/ Autism	pat aunt: FS	8 mos & 5yr: normal	strabismus
142R	F	M - Unknown F - Unknown	5 yr	5 mos	Febrile Seizures, Focal	Unclassified	no	moderate GDD/behavior changes(aggression)	parent: seizure; pat cousin: FS	5 mos: Diffuse cerebral cortical malformation in the pachygyria-lissencephaly spectrum.
143R	M	M - Unknown F - Unknown	13 yr	30 mos	Febrile Seizures, Focal	Unclassified	no	speech/language, school difficulties	maternal: epilepsy; sibling: epilepsy; half-sib, 2 mat cousins: FS	3,5 & 6 yr: normal	hyperkinetic movement disorder
144P	F	M - Black or African F - Black or African	3 yr	0.1 mos (Day 3)	Focal	Unclassified	Yes	normal	negative	3 weeks: normal
145R	F	M - Unknown F - Unknown	10 yr	18 mos	Generalized	EE	Yes	GDD/ADHD	pat aunt: seizure	3 yr: normal	maternal PKU
147R	M	M - Caucasian/ Native or First nations F - Caucasian	12 yr	7.9 mos	Focal, Generalized, Febrile Seizures	EE	Yes	GDD/ID	parent: migraine;	2 yr: mildly dysmorphic ventricular system 11 yr: Unchanged appearance of mildly abnormal morphology of the anterior horns of lateral ventricles bilaterally.	scoliosis, constipation,
148R	F	M - Unknown F - Unknown	14 yr	12 mos	Focal, Generalized, Febrile Seizures	Unclassified	Yes	GDD/ID/ASD	negative	2 & 7 yr: normal	microcephaly
149P	M	M – East Asian F - East Asian	4 yr	6.9 mos	Focal	Unclassified	Yes	NA	negative	7 mos: normal
150R	F	M - Caucasian / Native or First nations F - Caucasian / Native or First nations	17 yr	3 mos	Epileptic spasms, Focal, Generalized	EE	Yes	GDD/ID	pat cousin: epilepsy; parents: developmental issues	4 yr: bilateral diffuse white matter signal abnormality	GERD, scoliosis, precocious puberty, microcephaly, strabismus, hypotonic, hypo/hyperpigmentation
151P	F	M - Caucasian F - Caucasian	5 yr	18 mos	Infantile spasms	West syndrome	Yes	GDD	pat aunt: migraine	2 yr: normal
152R	F	M - Caucasian F - Caucasian	18 yr	7 mos	Focal and Generalized	EE	Yes	GDD/ ID/Autism	parent: FS	1 yr: normal 5 yr: normal 10 yr: surgical callosotomy	microcephaly, scoliosis
153R	F	M - Caucasian F - Caucasian	17 yr	14.4 mos	Epileptic spasms, Generalized	LGS	Yes	GDD with regression/ID/ASD	mat uncles and MGM: reading epilepsy, mat uncle: ID	2,4 & 13 yr: normal	asthma, menorrhagia, ovarian cysts
154P	F	M - Caucasian F - Caucasian	8 yr	36 mos	NA	LKS	Yes	GDD/ Autism/ ID	GP: seizure	5 yr: normal
155P	F	M - Caucasian F - Caucasian	7 yr	45.7 mos	Focal	other familial temporal lobe epilepsies	no	Anxiety/ Depression/ ADHD	MGF: MS, Depression, Paternal cousin: anxity, sensory issues, Paternal grandmother: Depression	4 yr: normal
158R	F	M - Caucasian F - Caucasian	18 yr	26.4 mos	Febrile Seizures, Generalized	MAE, GEFS+	Yes	normal/anxiety	Father: FS	4 yr: normal
159P	F	M - Caucasian F - Caucasian	3 yr	0.1 mos (Day 3)	Focal	Unclassified	Yes	normal	third degree paternal relative with seizures, developmental delay, hearing loss.	1 mos: normal
160R	F	M - Caucasian F - Native or First Nations	8 yr	27.5 mos	Focal	EE	Yes	GDD/ID	negative	3 & 5 yr: normal
164R	M	M - Caucasian F - Caucasian	23 yr	8 mos	epileptic spasms, generalized	West syndrome	Yes	GDD/ID	parent: seizure	6 yr: normal 10 yr: two small nonspecific foci of white matter signal abnormality
165P	M	M – East Asian F - East Asian	5 yr	21.6 mos	Focal, Febrile Seizures	GEFS+	Yes	speech/language	GP: seizure	2 yr: normal
167P	F	M - Caucasian F - Caucasian	3 yr	7.7 mos	Focal	Unclassified	no	normal	Father: focal seizures	8 mos: normal
168R	F	M – East Asian F - East Asian	8 yr	41.5 mos	Focal	EE	Yes	GDD/ID/ASD	negative	3 yr: normal
169P	M	M - Unknown F - Unknown	4 yr	12.6 mos	Febrile Seizures, Focal	Unclassified	Yes	normal	GP: anxiety; 1st cousin once removed: FS	1 & 2 yr: normal
171R	F	M - Caucasian F - Caucasian	20 yr	10 mos	Generalized, focal, Epileptic spasms	EE	Yes	GDD/ID/ASD	mat cousin: seizure; mat half-sib:seizure; sibs: FS; pat half-sib:ASD	2,5,10,12 yr: normal
172R	M	M - Caucasian F - Caucasian	16 yr	43.5 mos	Absence	CAE	Yes	school difficulties, anxiety, mood disorder, ADHD	parents: seizure, ADHD	12 yr: normal
173R	F	M – East Asian F - East Asian	8 yr	11 mos	epileptic spasms	West syndrome	Yes	GDD/ID	negative	2 yr: Progressive cerebellar atrophy and abnormal signal involving the globus pallidus	microcephaly, CVI, hyperkinetic movements
176P	F	M - Caucasian F - Caucasian	5 yr	16.7 mos	Focal	Unclassified	Yes	normal	pat uncle: seizures	2 yr: normal
186P	M	M –Caucasian F - East Asian	6 yr	35 mos	Focal	Unclassified	Yes	Gross/fine motor, regression	negative	3 yr: normal
190P	M	M - Caucasian F - Caucasian	6 yr	15.3 mos	Generalized	Unclassified	no	mild	Father: seizures as child; MGM: infantile seizures	3 yr: normal
191P	F	M - Native or First Nations F - Native or First Nations	3 yr	7 mos	Focal	SLFIE	no	normal	mat aunt: seizures; brother, father, pat aunt: FS; mat aunt: GDD	9 mos: normal
193P	M	M - Caucasian F - Native or First Nations	3 yr	1.5 mos	Infantile spasms	West syndrome	Yes	GDD	mat uncle: epilepsy	3 mos: normal
194P	F	M - Unknown F - Caucasian/ Asian	6 yr	38 mos	Focal	Unclassified	Yes	NA	parents: migraine	4 yr: normal
196P	M	M - Indian, Pakistani or South Asian F - Indian, Pakistani or South Asian	3 yr	4.2 mos	Infantile spasms	West syndrome	Yes	GDD	negative	4 mos: normal; 7 mos: enlarged CSF spaces, reduction cerebral/brainstem volume, prominent perivascular spaces	34 weeks gestation; aplasia cutis, renal tumor; ECCL syndrome
197P	M	M - Caucasian F - Caucasian	3 yr	4.4 mos	Focal and Generalized	Dravet	Yes	mild (Speech/language delay; Gross/fine motor)	mat great aunt: seizures	9 mos: normal
198P	M	M - Caucasian F - Caucasian	7 yr	57.4 mos	Generalized	Unclassified	no	GDD/ASD	Sibling: Febrile seizure, autism. Sibling: Autism. Father: Crohn's disease, kidney issues, hypertension, osteoarthritis. Mother: Atopy. Multiple: Abdominal aortic aneurysms. Maternal cousin: Dyslexia Maternal Cousin: Down syndrome.	5 yr: normal
200P	F	M - Caucasian F - Caucasian	3 yr	8.9 mos	Focal, Febrile Seizures	Dravet	Yes	normal	mat great aunt: FS	7 mos: edema centred in both high frontal lobes
201P	M	M - Unknown F - Unknown	3 yr	4.6 mos	Focal, Generalized, Febrile Seizures	Dravet	Yes	mild	MGM: seizures; pat uncle: FS	1 yr: normal
202P	M	M - Unknown F - Caucasian	2 yr	5 mos	Infantile spasms	West syndrome	no	normal	negative	5 mos: delayed myelination
203P	F	M - Black or African F - Caucasian	2 yr	6.2 mos	Focal, Epileptic Spasms	West syndrome	Yes	GDD	negative	6 mos: normal 2 yr: right frontal pole cortical dysplasia 2 yr: right frontal pole cortical dysplasi3 yr: right frontal lobe resection cavtiy	34 weeks gestation; gastroschisis
204R	M	M - Caucasian F - Caucasian	2 yr	3.5 mos	Focal, Epileptic Spasms	West syndrome	Yes	GDD	maternal cousin Development delay, seizures	3 mos & 2yr: normal
205P	M	M - Caucasian F - Caucasian	2 yr	0.1 mos (Day 3)	Focal	EE	Yes	GDD	Pat cousin: reading disability. Mat great-aunt: Migraine.	1 mos: normal
206P	M	M – East Asian F - East Asian	2 yr	4.6 mos	Focal	SLFIE	no	normal	Father, pat aunt: seizures	5 mos: normal
207R	F	M - Caucasian F - Caucasian	23 yr	22 mos	Generalized	Unclassified	yes	GDD/ID	negative	12 yr: normal	34 weeks gestation; strabismus, ataxia
208R	F	M - Unknown F - Unknown	9 yr	10.8 mos	Focal	Unclassified	no	mild ID/Autism	pat aunt: seizure, mood disorder	9 mos & 5yr: normal
213R	M	M - Caucasian F - Caucasian	5 yr	0.03 mos (day 1)	Focal	Unclassified	no	GDD/ID	negative	1 mos: normal 1 yr: possible right temporal cortical dysplasia with mesial temporal lobe sclerosis 4 yr: right mesial temporal sclerosis	alternating hemiplegia
216R	M	M - East Asian F - Caucasian	19 yr	46.3 mos	Generalized	LGS	Yes	GDD/ID/ASD	negative	4 yr: normal 7 yr: normal 8 yr: surgical removal of the genu and anterior 2/3 of corpus callosum
219R	F	M - Caucasian F - Caucasian	8 yr	38.4 mos	Focal	Unclassified	No	Learning Disorder/anxiety	Mother: mood disorder; mat aunt: ASD, learning disorder	6 yr: normal
221P	M	M - Caucasian F - Caucasian	3 yr	18.1 mos	Generalized	Unclassified	no	GDD	Multiple relatives: Spina Bifida	2 yr: small perivascular spaces within supratentorial brain, no clinical significance.	32 weeks gestation, macrocephaly
222P	F	M – East Asian F - East Asian	6 yr	52.1 mos	Epileptic spasms	EE	Yes	GDD/ Autism/ ID	negative	4 yr: normal	32 weeks; long QT, Failure to thrive
224R	M	M - Unknown F - Unknown	9 yr	1.2 mos	Epileptic spasms	West syndrome	no	GDD/ ID/ASD	Pat uncle with possible GDD, Pat great uncle with possible autism/ADHD	6 mos: prominent ventricles and subarachnoid spaces, otherwise normal 2 yr: myelination delayed with mildly enlarged CSF spaces.	macrocephaly
225P	F	M - Native or First Nations F - Native or First Nations	1 yr	4 mos	Generalized	Unclassified	no	mild (Speech/language; Cognition)/ID	sibling: seizures	5 mos : normal
227R	F	M –Arabic or Middle eastern F - Arabic or Middle eastern	4 yr	7 mos	Focal	Unclassified	no	GDD	Father had 1 seizure in infancy	1 yr: normal 1 yr: normal 3 yr: MTC suspicious cortical dysplasia 3 yr: unchanged	hypotonic
228R	M	M - Caucasian F - Caucasian	5 yr	23 mos	Focal, Generalized	EE	Yes	GDD, regression/ID	mother, mat uncle: seizure	2 & 4 yr: normal
230R	F	M - Caucasian F - Caucasian	12 yr	3.5 mos	Focal, Generalized, Epileptic spasms	West, LGS	Yes	GDD/ID/ASD	Paternal first cousin with seizures	3 yr: Delayed myelination and volume loss within white matter	G-tube
231R	F	M - Caucasian F - Caucasian	17 yr	32 mos	Febrile seizures, focal	GEFS+	no	Learning Disorder/anxiety	Sister: epilepsy, Mother: FS; Pat cousin: seizures	3 yr: normal
232R	F	M - Caucasian F - Caucasian	23 yr	1 mos	Focal, Epileptics spasms	West syndrome	Yes	GDD/ID/ASD	2 mat cousins: cataract; mat cousin: epilepsy	NA	CVI
233R	M	M - Indian, Pakistani or South Asian F - Indian, Pakistani or South Asian	6 yr	2.7 mos	Focal, Epileptic spasms	West syndrome	Yes	GDD/ Aggressive behavior/ID	negative	3 mos: Diffuse cortical dysplasia of the left occipital and temporal lobes. 2 yr: incipient mesial temporal sclerosis
234P	M	M – East Asian F - East Asian	1 yr	0.8 mos	Focal	Unclassified	no	normal	negative	1 mos: normal
236R	M	M –Arabic or Middle eastern F - Arabic or Middle eastern	3 yr	3.8 mos	Focal	Unclassified	no	normal	NA	4 mos: Incidental small cyst in the pituitary	34 weeks gestation
237P	F	M - Caucasian F - Caucasian	1 yr	1 mos	Focal	SLFIE	no	normal	mother: seizures	1 mos: normal
238P	F	M - Caucasian F - Caucasian	4 yr	6 mos	Febrile seizures, Focal	Unclassified	No	normal	Sibling: Narcolepsy	3 yr: possible early cerebellar atrophy
239P	M	M - Caucasian F - Caucasian	6 yr	25 mos	Febrile Seizures, Generalized	GEFS+	no	normal	Mother: depression	NA
241R	M	M - Caucasian F - Caucasian	10 yr	47.2 mos	NA	CSWS	No	mild/ASD/ADD	Mother, sibling, maternal aunt: reading disability	4 yr: normal
242P	F	M – East Asian F - East Asian	4 yr	34.9 mos	Febrile seizures, Focal	Unclassified	Yes	GDD/ASD	parent, cousin: seizure	3 yr: normal
244R	F	M - Caucasian F - Caucasian	16 yr	12 mos	Generalized	Unclassified	Yes	Gross/fine motor; Speech/language, ID	mother: learning difficulties	5 yr: 5mm lesion R frontal lobe heterotropic grey matter 6 yr: heterotropic grey matter 9 yr: heterotropic grey matter 13 yr: heterotropic grey matter
248R	F	M - Caucasian F - Caucasian	26 yr	37 mos	Febrile seizures, Focal, Generalized	Unclassified	Yes	Mild intellectual disability	paternal great great grand uncle: seizures, paternal first cousin and grand aunt: febrile seizures, Parents: Migraine	5 yr, 12 yr: asymmetric temproal lobe size 15 yr: Pre corpus callosotomy 17 yr: Partial callosotomy 18 yr: cortical resection left frontal lobe, cystic expansion within cavity 20 yr: cyst size reduction. Others unchanged.
ADHD=attention deficit hyperactivity disorder; AV=atrial valve; BG=basal ganglia; CAE = Childhood Absence Epilepsy; CC=corpus callosum; CP=cerebral palsy; CSWS=epileptic encephalopathy continuous spike-and-wave during sleep; CVI=cortical visual impairment; DCD=developmental coordination disorder; EE=unspecified epileptic encephalopathy; EPC=epilepsia partialis continua; F=female; FCD=focal cortic…
